# Supplementary material for: An Evaluation and Ranking of Children’s Hospital Websites in the United States
Source: PubMed Central journal article supplement (PMC5011553; doi:10.2196/jmir.5799), 2016-08-22
Supplement: jmir_v18i8e228_app1.pdf [file jmir_v18i8e228_app1.pdf]

**Table 1: Scale components and weightings**

| <b>Assessment components</b> | <b>Description</b>                                                                                                                                             | <b>Accessibility</b> | <b>Content</b> | <b>Marketing</b> | <b>Technical</b> | <b>Usability</b> | <b>all categoriesUsage across</b> |
|------------------------------|----------------------------------------------------------------------------------------------------------------------------------------------------------------|----------------------|----------------|------------------|------------------|------------------|-----------------------------------|
| Alternative text             | Assesses whether alternative text accompanies images                                                                                                           | 15%                  |                | 4%               | 4%               | 5%               | 6%                                |
| Amount of content            | Measures the number of pages with a reasonable amount of text                                                                                                  | 8%                   | 33%            | 9%               |                  | 5%               | 9%                                |
| Analytics                    | Determines whether website implements software packages to track new and recurring visitors, which web pages readers visit and for how long, etc.              |                      |                | 4%               | 4%               | 3%               | 3%                                |
| Broken links                 | Assesses whether the site contains links to web addresses that do not exist or return an error                                                                 | 8%                   |                | 1%               | 8%               | 5%               | 4%                                |
| Domain age                   | Identifies the original registration date of the organization's domain to determine age. This is a component of SEO systems                                    |                      |                | 4%               |                  |                  | 1%                                |
| Error pages                  | Checks for error messages and faults. Such errors are strongly suggestive of technical problems in the website                                                 |                      |                | 4%               | 8%               | 3%               | 3%                                |
| Facebook                     | Checks whether the website has a Facebook page, Facebook group, or personal Facebook profile and scores that site by the number of likes published by Facebook |                      |                | 8%               |                  | 4%               | 3%                                |
| Headings                     | Assesses whether headings are used effectively throughout the site to improve search engine placement, accessibility, and usability                            | 8%                   |                | 4%               | 8%               | 5%               | 5%                                |
| Incoming links               | Measures the number of links from major search engines, including Yahoo! and Google                                                                            |                      |                | 9%               |                  | 5%               | 4%                                |
| Link states                  | Assesses the use of cascading style sheets (CSS) - the industry standard for page                                                                              | 15%                  |                |                  | 8%               | 4%               | 5%                                |

|                       |                                                                                                                                                                                                                        |    |     |     |     |     |    |
|-----------------------|------------------------------------------------------------------------------------------------------------------------------------------------------------------------------------------------------------------------|----|-----|-----|-----|-----|----|
|                       | design, font sizing, and style                                                                                                                                                                                         |    |     |     |     |     |    |
| Missing files         | Assessed the absence to referred files on the page, resulting in failed page construction                                                                                                                              |    |     |     | 8%  | 3%  | 2% |
| Open Graph            | Open Graph tags are the emerging standard to facilitate sharing of web content on social media                                                                                                                         |    |     | 4%  | 6%  | 4%  | 3% |
| Popularity            | Calculates the relative Alexa ranking of popularity compared to other websites and whether the ranking is rising or falling; Alexa combines the viewing history of many web browsers using particular browser toolbars |    |     | 9%  |     | 6%  | 4% |
| Printability          | Determines whether a web page is designed to be printed and whether specific CSS style sheets are designed for printing                                                                                                |    |     |     | 8%  | 5%  | 3% |
| Readability           | Assesses the comprehensibility and quality of site content using the Flesch-Kincaid Reading Ease and Gunning Fog Index scales                                                                                          | 8% | 33% | 2%  |     | 5%  | 7% |
| Redirections          | Assesses the ability to move backward and forward across pages using browser buttons                                                                                                                                   | 6% |     |     | 6%  | 1%  | 2% |
| Search engine results | Determines how text from a web page appears in Google search results                                                                                                                                                   | 4% | 13% | 7%  | 4%  | 5%  | 6% |
| Social interest       | Checks the amount of social interest that individual pages within the website have. Heavily reliant on Facebook Likes and Twitter for its calculation.                                                                 |    |     | 11% |     | 5%  | 5% |
| Speed                 | Assesses the use of files in the website— specifically, how large the files are, how long they take to download, and whether any are missing                                                                           | 6% |     | 3%  | 15% | 10% | 7% |
| Spelling              | Determines whether the words on a page are spelled correctly                                                                                                                                                           |    | 20% |     |     |     | 2% |
| Stylesheets           | Determines whether and how effectively CSS is used throughout the site, such as avoiding embedded style                                                                                                                | 8% |     | 1%  | 6%  | 5%  | 4% |

|                |                                                                                                                                                                                |    |  |    |    |    |    |
|----------------|--------------------------------------------------------------------------------------------------------------------------------------------------------------------------------|----|--|----|----|----|----|
|                | sheets and tables for website positioning                                                                                                                                      |    |  |    |    |    |    |
| Twitter        | Determines whether the website has a Twitter account and how often the account is referred to                                                                                  |    |  | 7% |    | 3% | 3% |
| URL format     | Assesses the use of natural language to improve the readability of the address for each page                                                                                   | 7% |  | 7% | 4% | 4% | 5% |
| W3C compliance | Assesses whether the website implements best practices and meets specifications for site development according to the W3C, a consortium and standards body of web technologies | 8% |  |    | 8% | 5% | 4% |

Note: Percentages do not add to 100 for rounding reasons.
