# Supplementary material for: An Evaluation and Ranking of Children’s Hospital Websites in the United States
Source: PubMed Central journal article supplement (PMC5011553; doi:10.2196/jmir.5799), 2016-08-22
Supplement: jmir_v18i8e228_app2.pdf [file jmir_v18i8e228_app2.pdf]

**Multimedia Appendix 2.** Ranking of the top 100 children’s hospital websites for each dimension and an average ranking across dimensions.

| Children’s hospital name                                                         | Accessibility |      | Content |      | Marketing |      | Technology |      | Usability |      | Overall      |               |
|----------------------------------------------------------------------------------|---------------|------|---------|------|-----------|------|------------|------|-----------|------|--------------|---------------|
|                                                                                  | Score         | Rank | Score   | Rank | Score     | Rank | Score      | Rank | Score     | Rank | Average Rank | Over-all Rank |
| The Children's Hospital of Philadelphia                                          | 6.5           | 10   | 9.1     | 6    | 8.8       | 1    | 8.1        | 1    | 7.6       | 2    | 4            | 1             |
| Nationwide Children's Hospital                                                   | 6.5           | 10   | 9       | 10   | 8.5       | 2    | 8          | 2    | 7.1       | 27   | 10.2         | 2             |
| Children's Hospital of Wisconsin                                                 | 6.2           | 18   | 8.9     | 17   | 8         | 12   | 7.8        | 4    | 7.6       | 2    | 10.6         | 3             |
| Doernbecher Children's Hospital at the Oregon Health and Science University      | 6.3           | 16   | 8.9     | 17   | 8         | 12   | 7.6        | 7    | 7.3       | 15   | 13.4         | 4             |
| Cincinnati Children's Hospital Medical Center                                    | 6             | 28   | 9       | 10   | 8.3       | 4    | 7.6        | 7    | 7.2       | 20   | 13.8         | 5             |
| Children's Hospital Colorado                                                     | 5.9           | 36   | 8.8     | 21   | 8.1       | 8    | 7.7        | 6    | 7.4       | 9    | 16           | 6             |
| Mattel Children's Hospital University of California at Los Angeles               | 6.7           | 5    | 9.2     | 2    | 7.7       | 29   | 7.8        | 4    | 6.8       | 40   | 16           | 6             |
| The Children's Hospital at Oklahoma University Medical Center                    | 5.9           | 36   | 8.8     | 21   | 8.1       | 8    | 7.5        | 11   | 7.3       | 15   | 18.2         | 8             |
| St. Jude Children's Research Hospital                                            | 5.8           | 48   | 9       | 10   | 8.4       | 3    | 7.9        | 3    | 7         | 31   | 19           | 9             |
| The Children's Medical Center of Dayton                                          | 5.8           | 48   | 9.2     | 2    | 8         | 12   | 7.5        | 11   | 7         | 31   | 20.8         | 10            |
| Children's Hospital of Pittsburgh of University of Pittsburgh Medical Center     | 5.5           | 71   | 9       | 10   | 8.2       | 6    | 7.6        | 7    | 7.2       | 20   | 22.8         | 11            |
| University of Michigan C.S. Mott Children's and Von Voigtlander Women's Hospital | 6             | 28   | 8.7     | 36   | 7.6       | 37   | 7.5        | 11   | 7.4       | 9    | 24.2         | 12            |
| Children's Memorial Hermann Hospital                                             | 6.8           | 3    | 8.9     | 17   | 7.9       | 16   | 7.2        | 32   | 6.3       | 57   | 25           | 13            |

| Children's hospital name                                               | Accessibility |      | Content |         | Marketing |      | Technology |      | Usability |      | Overall      |              |
|------------------------------------------------------------------------|---------------|------|---------|---------|-----------|------|------------|------|-----------|------|--------------|--------------|
|                                                                        | Score         | Rank | Score   | Rank    | Score     | Rank | Score      | Rank | Score     | Rank | Average Rank | Overall Rank |
| Phoenix Children's Hospital                                            | 6             | 28   | 8.8     | 21      | 7.9       | 16   | 7.4        | 15   | 6.5       | 48   | 25.6         | 14           |
| Blank Children's Hospital                                              | 5.9           | 36   | 9.1     | 6       | 7.6       | 37   | 7.3        | 22   | 7         | 31   | 26.4         | 15           |
| Lucile Packard Children's Hospital at Stanford                         | 6.1           | 23   | 8.8     | 21      | 7.2       | 59   | 7.3        | 22   | 7.4       | 9    | 26.8         | 16           |
| Children's Hospital at Dartmouth<br>Dartmouth-Hitchcock Medical Center | 6.8           | 3    | 9.1     | 6       | 6.7       | 82   | 7.1        | 38   | 7.5       | 6    | 27           | 17           |
| Miami Children's Hospital                                              | 6.2           | 18   | 9       | 10      | 8.1       | 8    | 7.1        | 38   | 5.9       | 69   | 28.6         | 18           |
| Children's Medical Center Dallas                                       | 5.9           | 36   | 8.8     | 21      | 8.3       | 4    | 7.3        | 22   | 6         | 64   | 29.4         | 19           |
| Yale New Haven Children's Hospital                                     | 5.9           | 36   | 8.7     | 36      | 7.6       | 37   | 7.3        | 22   | 7.1       | 27   | 31.6         | 20           |
| University of Virginia Children's Hospital                             | 6.6           | 7    | 8.8     | 21      | 7.8       | 20   | 7          | 48   | 6         | 64   | 32           | 21           |
| University of California Davis Children's Hospital                     | 5.9           | 36   | 8.5     | 66      | 7.7       | 29   | 7.4        | 15   | 7.2       | 20   | 33.2         | 22           |
| Dell Children's Medical Center of Central Texas                        | 6.1           | 23   | 8.5     | 66      | 7.2       | 59   | 7.4        | 15   | 7.4       | 9    | 34.4         | 23           |
| University of Iowa Children's Hospital                                 | 5.5           | 71   | 8.6     | 51      | 7.8       | 20   | 7.4        | 15   | 7.3       | 15   | 34.4         | 23           |
| The Mount Sinai Kravis Children's Hospital                             | 6.6           | 7    | 8       | 12<br>8 | 7.7       | 29   | 7.5        | 11   | 7.7       | 1    | 35.2         | 25           |
| Janet Weis Children's Hospital at Geisinger Medical Center             | 6.1           | 23   | 8.7     | 36      | 7.8       | 20   | 7.1        | 38   | 6         | 64   | 36.2         | 26           |
| Children's Healthcare of Atlanta                                       | 5.5           | 71   | 8.8     | 21      | 8.2       | 6    | 7.3        | 22   | 6         | 64   | 36.8         | 27           |
| Akron Children's Hospital                                              | 5.7           | 58   | 8.8     | 21      | 7.8       | 20   | 7.2        | 32   | 6.2       | 60   | 38.2         | 28           |
| Diamond Children's Medical Center                                      | 5.9           | 36   | 8.5     | 66      | 7.4       | 49   | 7.3        | 22   | 7.2       | 20   | 38.6         | 29           |
| Rady Children's Hospital - San Diego                                   | 5.8           | 48   | 8.5     | 66      | 7.6       | 37   | 7.4        | 15   | 7.1       | 27   | 38.6         | 29           |
| American Family Children's Hospital                                    | 5.5           | 71   | 8.5     | 66      | 7.7       | 29   | 7.4        | 15   | 7.3       | 15   | 39.2         | 31           |

| Children's hospital name                                                   | Accessibility |      | Content |      | Marketing |      | Technology |      | Usability |      | Overall      |              |
|----------------------------------------------------------------------------|---------------|------|---------|------|-----------|------|------------|------|-----------|------|--------------|--------------|
|                                                                            | Score         | Rank | Score   | Rank | Score     | Rank | Score      | Rank | Score     | Rank | Average Rank | Overall Rank |
| Hurley Children's Hospital                                                 | 5.9           | 36   | 9.2     | 2    | 7.8       | 20   | 6.9        | 53   | 5.4       | 88   | 39.8         | 32           |
| Hasbro Children's Hospital at Rhode Island Hospital                        | 6.4           | 12   | 8.4     | 82   | 7.1       | 65   | 7.2        | 32   | 7.4       | 9    | 40           | 33           |
| University of Minnesota Amplatz Children's Hospital                        | 5.6           | 66   | 8.7     | 36   | 7.5       | 46   | 7.3        | 22   | 7         | 31   | 40.2         | 34           |
| Seattle Children's                                                         | 3.8           | 120  | 9.2     | 2    | 8.1       | 8    | 7.3        | 22   | 6.3       | 57   | 41.8         | 35           |
| Gillette Children's Specialty Healthcare                                   | 5.9           | 36   | 8.5     | 66   | 7.7       | 29   | 7.2        | 32   | 6.4       | 53   | 43.2         | 36           |
| Cleveland Clinic Children's Hospital for Rehabilitation                    | 5             | 96   | 8.6     | 51   | 7.8       | 20   | 7.3        | 22   | 7         | 31   | 44           | 37           |
| All Children's Hospital                                                    | 4.7           | 105  | 8.8     | 21   | 7.4       | 49   | 7.3        | 22   | 7.1       | 27   | 44.8         | 38           |
| Boston Children's Hospital                                                 | 6             | 28   | 8.8     | 21   | 7.7       | 29   | 6.7        | 67   | 5.7       | 79   | 44.8         | 38           |
| University of Maryland Children's Hospital                                 | 3.8           | 120  | 9       | 10   | 7.9       | 16   | 7.1        | 38   | 6.7       | 42   | 45.2         | 40           |
| Cleveland Clinic Children's Hospital                                       | 4.6           | 108  | 8.6     | 51   | 7.8       | 20   | 7.4        | 15   | 6.9       | 37   | 46.2         | 41           |
| University Hospitals Rainbow Babies and Children's Hospital                | 6.7           | 5    | 8.3     | 98   | 7.4       | 49   | 7.2        | 32   | 6.5       | 48   | 46.4         | 42           |
| The Children's Institute                                                   | 6             | 28   | 8.7     | 36   | 7.1       | 65   | 6.9        | 53   | 6.3       | 57   | 47.8         | 43           |
| Greenville Health System Children's Hospital                               | 7.4           | 1    | 8.1     | 122  | 6.9       | 75   | 7.1        | 38   | 7.5       | 6    | 48.4         | 44           |
| Mt. Washington Pediatric Hospital, Inc                                     | 6.1           | 23   | 8.4     | 82   | 7.4       | 49   | 7          | 48   | 6.5       | 48   | 50           | 45           |
| Children's National Medical Center                                         | 5.6           | 66   | 8.6     | 51   | 7.9       | 16   | 7.1        | 38   | 5.7       | 79   | 50           | 45           |
| Miller Children's Hospital Long Beach                                      | 6.1           | 23   | 8.7     | 36   | 7.1       | 65   | 6.8        | 61   | 5.9       | 69   | 50.8         | 47           |
| Golisano Children's Hospital at The University of Rochester Medical Center | 5.8           | 48   | 8.3     | 98   | 7.7       | 29   | 7.1        | 38   | 6.7       | 42   | 51           | 48           |
| Sutter Children's Center, Sacramento                                       | 6             | 28   | 8.2     | 109  | 6.7       | 82   | 7.1        | 38   | 7.6       | 2    | 51.8         | 49           |

| Children's hospital name                                            | Accessibility |      | Content |         | Marketing |      | Technology |      | Usability |         | Overall      |              |
|---------------------------------------------------------------------|---------------|------|---------|---------|-----------|------|------------|------|-----------|---------|--------------|--------------|
|                                                                     | Score         | Rank | Score   | Rank    | Score     | Rank | Score      | Rank | Score     | Rank    | Average Rank | Overall Rank |
| Brenner Children's Hospital, Wake Forest Baptist Health             | 5.5           | 71   | 8.9     | 17      | 6.7       | 82   | 6.8        | 61   | 6.9       | 37      | 53.6         | 50           |
| Franciscan Hospital for Children                                    | 5.8           | 48   | 8.1     | 12<br>2 | 7.1       | 65   | 7.2        | 32   | 7.6       | 2       | 53.8         | 51           |
| Children's Hospital and Research Center at Oakland                  | 6.2           | 18   | 8.4     | 82      | 7.3       | 54   | 6.9        | 53   | 5.9       | 69      | 55.2         | 52           |
| Upstate Golisano Children's Hospital                                | 6.2           | 18   | 8.5     | 66      | 7.2       | 59   | 6.8        | 61   | 5.8       | 74      | 55.6         | 53           |
| St. Christopher's Hospital for Children                             | 5.8           | 48   | 8.7     | 36      | 7.6       | 37   | 6.7        | 67   | 5.3       | 92      | 56           | 54           |
| East Tennessee Children's Hospital                                  | 5.7           | 58   | 8.4     | 82      | 7.7       | 29   | 7          | 48   | 6         | 64      | 56.2         | 55           |
| The Goryeb Children's Hospital                                      | 7             | 2    | 8.2     | 10<br>9 | 6.4       | 100  | 6.9        | 53   | 7.2       | 20      | 56.8         | 56           |
| Kennedy Krieger Institute                                           | 5.8           | 48   | 8.3     | 98      | 7.3       | 54   | 7.1        | 38   | 6.5       | 48      | 57.2         | 57           |
| Primary Children's Medical Center                                   | 5.3           | 87   | 8.6     | 51      | 7.3       | 54   | 6.9        | 53   | 6.6       | 46      | 58.2         | 58           |
| Women and Children's Hospital of Buffalo                            | 5.7           | 58   | 8.6     | 51      | 6.9       | 75   | 6.8        | 61   | 6.6       | 46      | 58.2         | 58           |
| Arkansas Children's Hospital                                        | 4.8           | 100  | 9.1     | 6       | 7.8       | 20   | 6.8        | 61   | 4.9       | 10<br>6 | 58.6         | 60           |
| Cardon Children's Medical Center                                    | 5.2           | 92   | 8.7     | 36      | 7.3       | 54   | 6.9        | 53   | 6.2       | 60      | 59           | 61           |
| Children's Hospital of Richmond at Virginia Commonwealth University | 5.8           | 48   | 8.2     | 10<br>9 | 6.9       | 75   | 6.9        | 53   | 7.2       | 20      | 61           | 62           |
| Cook Children's Medical Center                                      | 3.9           | 118  | 9       | 10      | 7.5       | 46   | 7          | 48   | 5.5       | 85      | 61.4         | 63           |
| Mission Children's Hospital at Mission Health                       | 5.7           | 58   | 8.7     | 36      | 6.7       | 82   | 6.6        | 74   | 6.2       | 60      | 62           | 64           |
| Shriners Hospitals for Children - all sites                         | 4.7           | 105  | 8.4     | 82      | 7.3       | 54   | 7.1        | 38   | 6.9       | 37      | 63.2         | 65           |
| New York-Presbyterian, Morgan Stanley Children's Hospital           | 4.8           | 100  | 8.7     | 36      | 6.1       | 115  | 6.9        | 53   | 7.3       | 15      | 63.8         | 66           |
| The Joseph M. Sanzari Children's                                    | 6.3           | 16   | 8.3     | 98      | 6.5       | 97   | 6.7        | 67   | 6.7       | 42      | 64           | 67           |

| Children's hospital name                                                   | Accessibility |      | Content |      | Marketing |      | Technology |      | Usability |      | Overall      |              |
|----------------------------------------------------------------------------|---------------|------|---------|------|-----------|------|------------|------|-----------|------|--------------|--------------|
|                                                                            | Score         | Rank | Score   | Rank | Score     | Rank | Score      | Rank | Score     | Rank | Average Rank | Overall Rank |
| Hospital Hackensack University Medical Center                              |               |      |         |      |           |      |            |      |           |      |              |              |
| Walt Disney Pavilion at Florida Hospital for Children                      | 5.7           | 58   | 8.7     | 36   | 7.1       | 65   | 6.5        | 77   | 5.2       | 94   | 66           | 68           |
| Duke Children's Hospital and Health Center                                 | 5.3           | 87   | 8.3     | 98   | 7.2       | 59   | 7          | 48   | 6.8       | 40   | 66.4         | 69           |
| MassGeneral Hospital for Children Massachusetts General Hospital           | 5.5           | 71   | 8.8     | 21   | 7.8       | 20   | 4.7        | 130  | 5.2       | 94   | 67.2         | 70           |
| Kosair Children's Hospital                                                 | 5.8           | 48   | 8.6     | 51   | 7         | 70   | 6.3        | 83   | 5.2       | 94   | 69.2         | 71           |
| University of California at San Francisco Benioff Children's Hospital      | 5.5           | 71   | 8.6     | 51   | 7.2       | 59   | 6.7        | 67   | 5.1       | 99   | 69.4         | 72           |
| Johns Hopkins Children's Center                                            | 6.4           | 12   | 8.6     | 51   | 7.4       | 49   | 4.6        | 132  | 5         | 103  | 69.4         | 72           |
| St Louis Children's Hospital                                               | 4.4           | 112  | 8.8     | 21   | 7.6       | 37   | 6.7        | 67   | 4.6       | 111  | 69.6         | 74           |
| St. Joseph's Children's Hospital                                           | 5.8           | 48   | 8.5     | 66   | 6.3       | 108  | 6.5        | 77   | 6.4       | 53   | 70.4         | 75           |
| MultiCare Mary Bridge Children's Hospital and Health Center                | 5.9           | 36   | 8.1     | 12   | 7.6       | 37   | 6.7        | 67   | 5.2       | 94   | 71.2         | 76           |
| Children's Hospital of Illinois at OSF Saint Francis Medical Center        | 6             | 28   | 8.8     | 21   | 7         | 70   | 4.2        | 137  | 4.5       | 113  | 73.8         | 77           |
| Riley Hospital for Children at Indiana University Health                   | 5.5           | 71   | 9.7     | 1    | 7.6       | 37   | 4.4        | 134  | 3.9       | 127  | 74           | 78           |
| K. Hovnanian Children's Hospital at Jersey Shore University Medical Center | 5.4           | 81   | 8.7     | 36   | 6.4       | 100  | 6.4        | 81   | 5.8       | 74   | 74.4         | 79           |
| Nemours Children's Hospital                                                | 5.7           | 58   | 8.7     | 36   | 8         | 12   | 4.3        | 135  | 3.2       | 132  | 74.6         | 80           |
| Sacred Heart Children's Hospital                                           | 5.5           | 71   | 8.1     | 12   | 6.4       | 100  | 6.8        | 61   | 7.2       | 20   | 74.8         | 81           |

| Children's hospital name                                                                | Accessibility |      | Content |      | Marketing |      | Technology |      | Usability |      | Overall      |              |
|-----------------------------------------------------------------------------------------|---------------|------|---------|------|-----------|------|------------|------|-----------|------|--------------|--------------|
|                                                                                         | Score         | Rank | Score   | Rank | Score     | Rank | Score      | Rank | Score     | Rank | Average Rank | Overall Rank |
| Blythedale Children's Hospital                                                          | 5.9           | 36   | 8.2     | 109  | 7.2       | 59   | 6.5        | 77   | 5.2       | 94   | 75           | 82           |
| McLane Children's Scott and White                                                       | 5.5           | 71   | 8.5     | 66   | 6.8       | 81   | 6.3        | 83   | 5.5       | 85   | 77.2         | 83           |
| Helen DeVos Children's Hospital                                                         | 5.4           | 81   | 8.6     | 51   | 6.6       | 91   | 6.3        | 83   | 5.6       | 81   | 77.4         | 84           |
| Children's Mercy Hospital                                                               | 4.5           | 110  | 8.5     | 66   | 6.7       | 82   | 6.6        | 74   | 6.1       | 63   | 79           | 85           |
| West Virginia University Children's Hospital                                            | 5.6           | 66   | 8.3     | 98   | 5.9       | 126  | 6.5        | 77   | 7         | 31   | 79.6         | 86           |
| Ann and Robert H. Lurie Children's Hospital of Chicago                                  | 4.9           | 99   | 8.6     | 51   | 7         | 70   | 6.1        | 96   | 5.4       | 88   | 80.8         | 87           |
| Children's Hospital of Michigan                                                         | 5.4           | 81   | 8.2     | 109  | 7.6       | 37   | 6.6        | 74   | 5         | 103  | 80.8         | 87           |
| Loma Linda University Children's Hospital                                               | 5.2           | 92   | 8.5     | 66   | 6.6       | 91   | 6.4        | 81   | 5.6       | 81   | 82.2         | 89           |
| Texas Children's Hospital                                                               | 2.7           | 146  | 8.4     | 82   | 7         | 70   | 6.7        | 67   | 6.5       | 48   | 82.6         | 90           |
| The Bristol-Myers Squibb Children's Hospital at Robert Wood Johnson University Hospital | 5.3           | 87   | 8.4     | 82   | 6.4       | 100  | 6.3        | 83   | 5.8       | 74   | 85.2         | 91           |
| North Carolina Children's Hospital University of North Carolina Hospitals               | 6.2           | 18   | 7.9     | 132  | 6.6       | 91   | 6.2        | 92   | 5.1       | 99   | 86.4         | 92           |
| Memorial Children's Hospital                                                            | 6             | 28   | 4.6     | 149  | 5.1       | 142  | 5.7        | 110  | 7.4       | 9    | 87.6         | 93           |
| El Paso Children's Hospital                                                             | 5.9           | 36   | 8.2     | 109  | 6.6       | 91   | 6          | 99   | 5         | 103  | 87.6         | 93           |
| Arnold Palmer Hospital for Children                                                     | 4.8           | 100  | 8.6     | 51   | 7         | 70   | 6.1        | 96   | 4.2       | 121  | 87.6         | 93           |
| La Rabida Children's Hospital                                                           | 6.6           | 7    | 8.2     | 109  | 6.4       | 100  | 6.1        | 96   | 2.7       | 135  | 89.4         | 96           |
| Beaumont Children's Hospital                                                            | 3.5           | 133  | 8.8     | 21   | 6.7       | 82   | 5.9        | 106  | 4.8       | 108  | 90           | 97           |
| Hoops Family Children's Hospital                                                        | 6.4           | 12   | 7.9     | 132  | 5.7       | 129  | 6          | 99   | 5.6       | 81   | 90.6         | 98           |
| Le Bonheur Children's Hospital                                                          | 2.7           | 146  | 8.4     | 82   | 7.5       | 46   | 6.3        | 83   | 5.1       | 99   | 91.2         | 99           |
| The Children's Hospital at Saint Francis                                                | 3.9           | 118  | 8.6     | 51   | 5.4       | 137  | 6          | 99   | 6.4       | 53   | 91.6         | 100          |
